# Supplementary figures and images for: CO2 per se activates carbon dioxide receptors
Source: PubMed Central journal article supplement — Insect Biochem Mol Biol. Author manuscript; Available in PMC 2020 Feb 1. (PMC6980743; doi:10.1016/j.ibmb.2019.103284), 2019-11-22

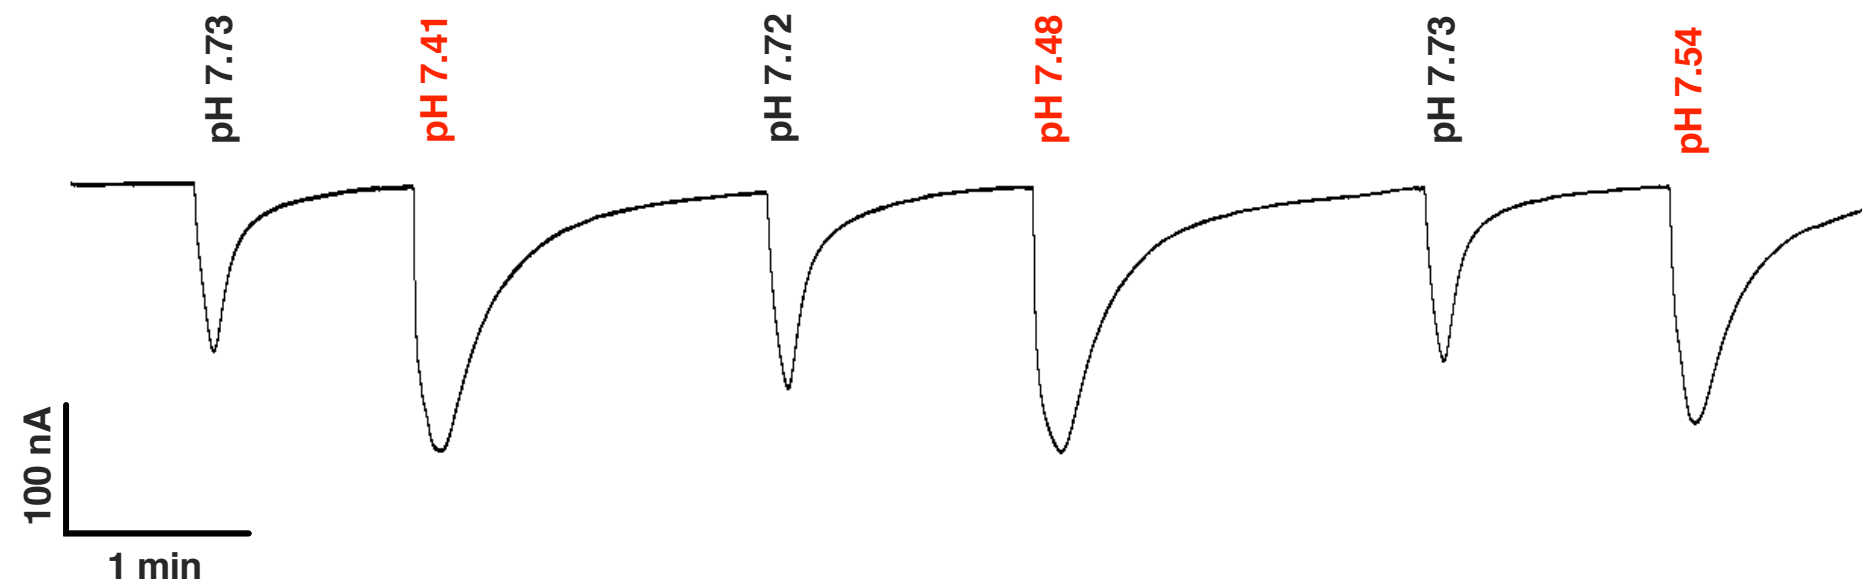

Supplement: NIHMS1544420-supplement-5.pdf [file NIHMS1544420-supplement-5.pdf]

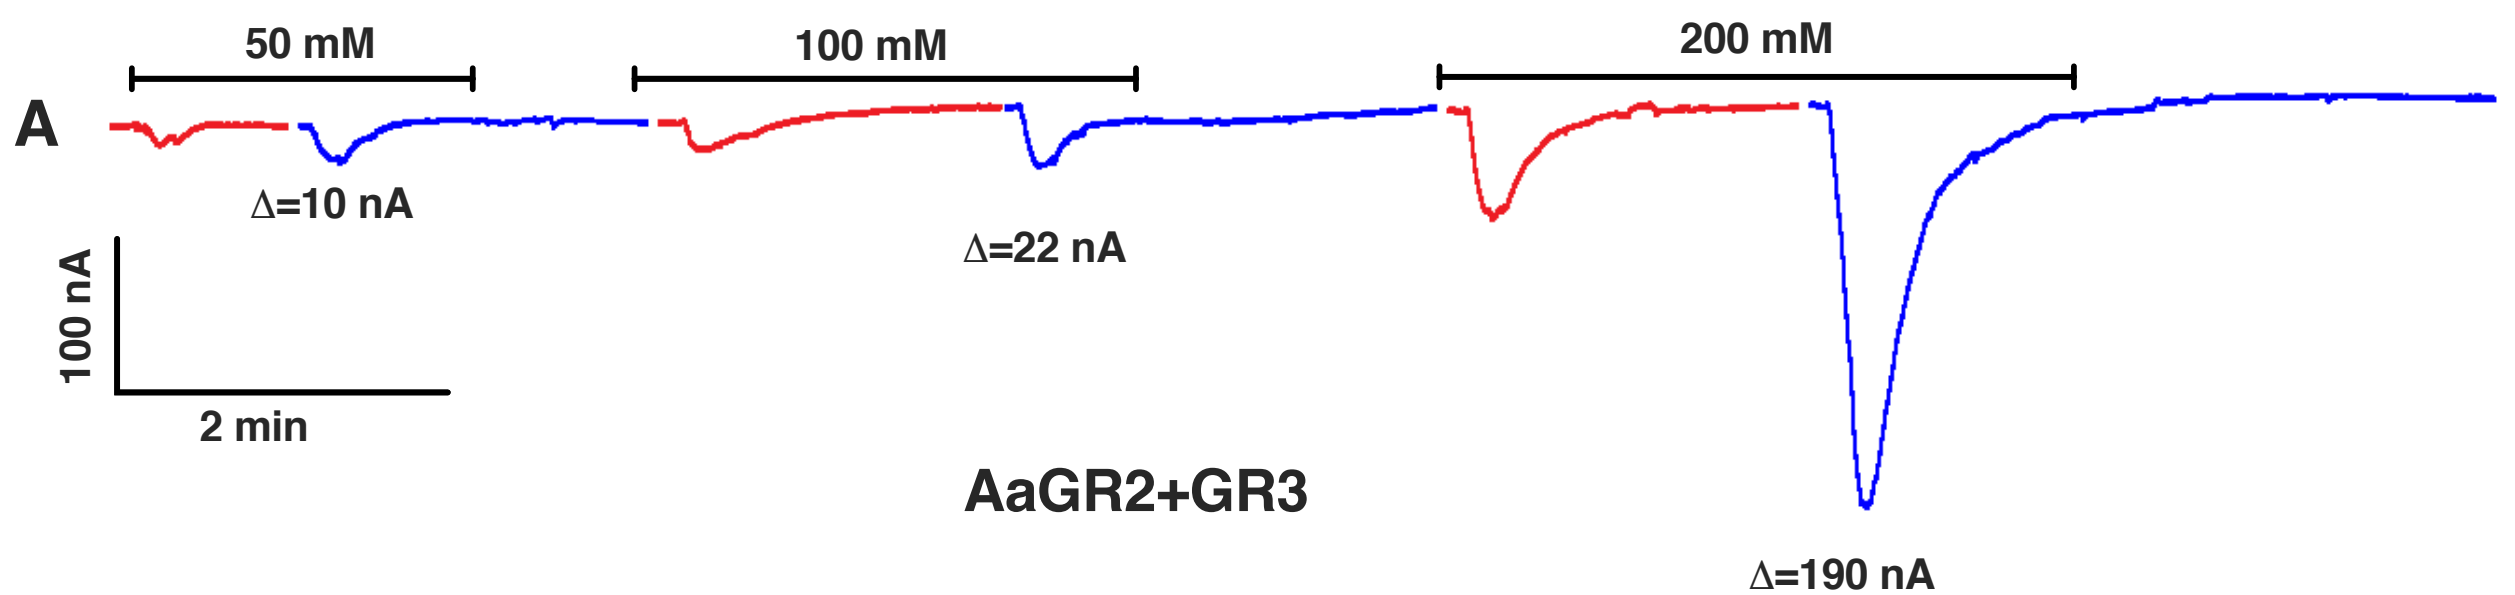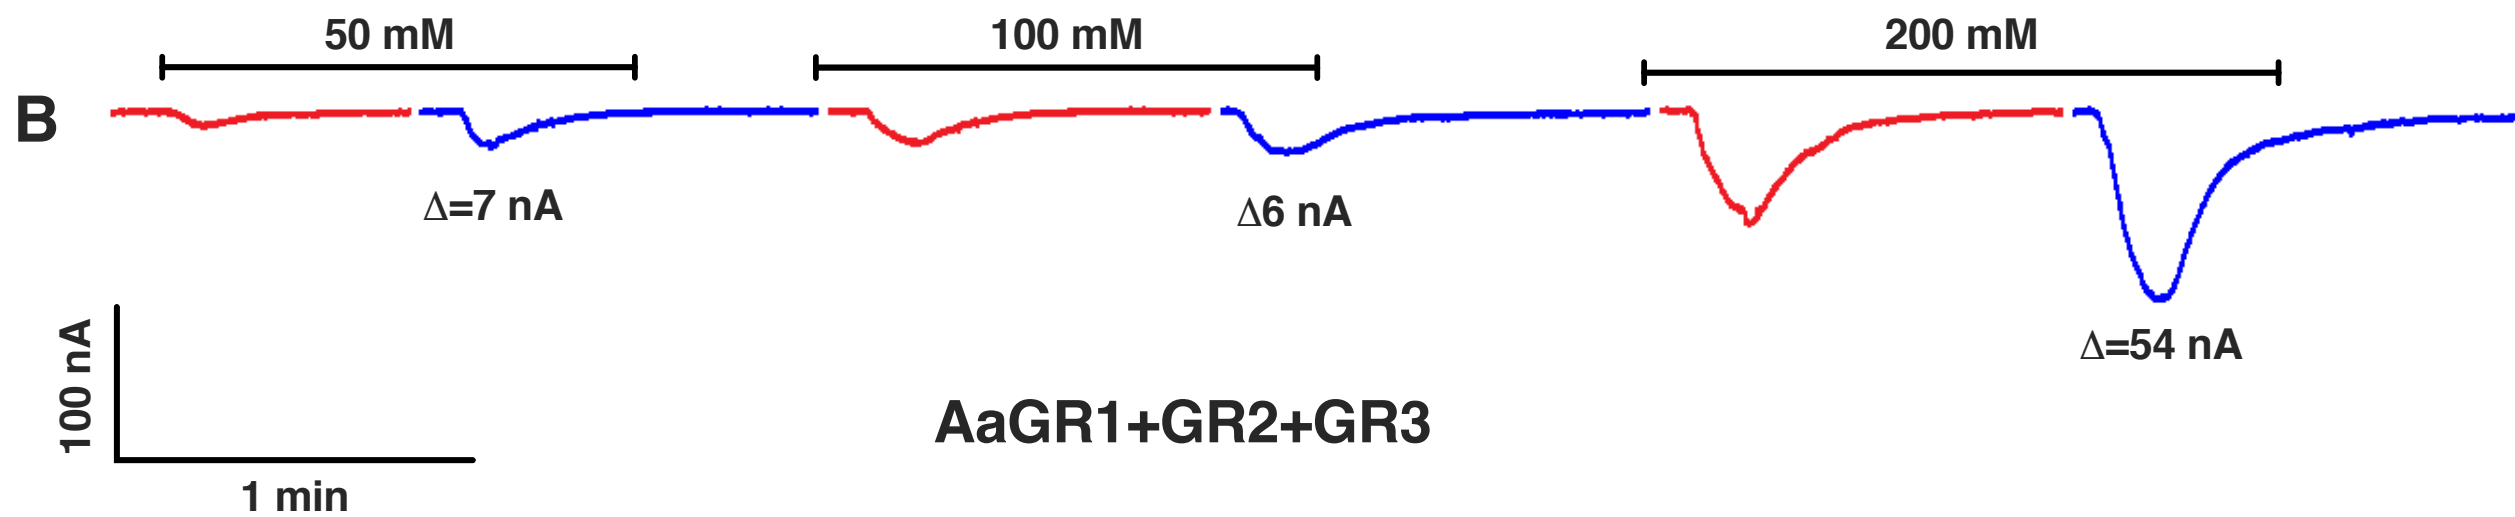

Supplement: NIHMS1544420-supplement-6.pdf [file NIHMS1544420-supplement-6.pdf]
